# Supplementary material
Source: publisher figshare collection journal article supplement (https://acs.figshare.com/ndownloader/files/4529014)
Supplement: Supplementary file 1 [file 4529014]

## Supporting Information.

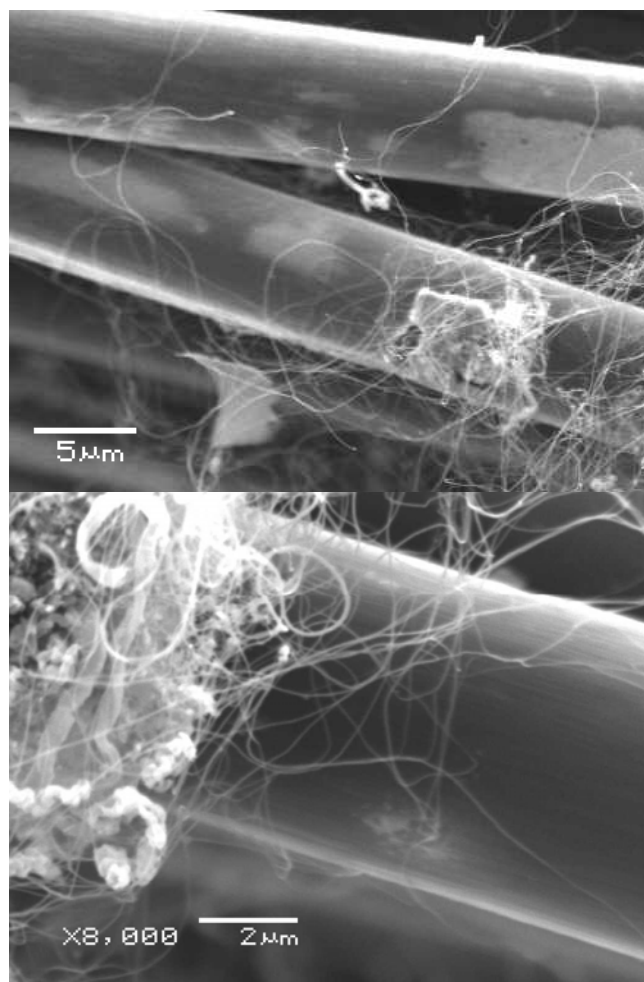

**Figure S1.** Long CNTs, CNT bundles, and large-diameter fibrils extending from a carbon fiber coated with zirconia nanoparticles produced by dip-coating in  $\text{ZrOCl}_2$  solution followed by  $\text{H}_2$  reduction.
